# Supplementary material for: Kinetics and mechanism of oxidation of thioglycolic acid by hexachloroiridate(iv)
Source: Royal Society of Chemistry journal article supplement (doi:10.1039/b105951n), 2002-01-01
Supplement: b105951n.pdf [file b105951n.pdf]

## Supplementary Material

**Table S-1.** Pseudo-first-order rate constants for the oxidation of TGA by  $[\text{IrCl}_6]^{2-}$ .

| [TGA] <sub>0</sub> , M | [Ir(IV)] <sub>0</sub> , mM | [bathophen], mM | buffer      | $\mu$ , M | pH   | $k_{\text{obs}}$ , s <sup>-1</sup> |
|------------------------|----------------------------|-----------------|-------------|-----------|------|------------------------------------|
| 0.02                   | 0.1                        | 0.10            | acetate     | 0.12      | 4.61 | 4.78                               |
| 0.02                   | 0.1                        | 0.4             | acetate     | 0.12      | 4.57 | 2.67                               |
| 0.02                   | 0.1                        | 0.7             | acetate     | 0.12      | 4.58 | 2.25                               |
| 0.02                   | 0.1                        | 1.0             | acetate     | 0.12      | 4.56 | 1.92                               |
| $1 \times 10^{-2}$     | 0.01                       | 1.0             | acetate     | 0.11      | 4.75 | 1.11                               |
| $1 \times 10^{-2}$     | 0.02                       | 1.0             | acetate     | 0.11      | 4.71 | 1.05                               |
| $1 \times 10^{-2}$     | 0.04                       | 1.0             | acetate     | 0.11      | 4.72 | 1.05                               |
| $1 \times 10^{-2}$     | 0.06                       | 1.0             | acetate     | 0.11      | 4.70 | 1.08                               |
| $1 \times 10^{-2}$     | 0.08                       | 1.0             | acetate     | 0.11      | 4.68 | 1.10                               |
| $1 \times 10^{-2}$     | 0.1                        | 1.0             | acetate     | 0.11      | 4.68 | 1.13                               |
| $1 \times 10^{-3}$     | 0.1                        | 1.0             | acetate     | 0.10      | 4.57 | 0.189                              |
| $2 \times 10^{-3}$     | 0.1                        | 1.0             | acetate     | 0.10      | 4.53 | 0.264                              |
| $5 \times 10^{-3}$     | 0.1                        | 1.0             | acetate     | 0.11      | 4.54 | 0.553                              |
| $1 \times 10^{-2}$     | 0.1                        | 1.0             | acetate     | 0.11      | 4.56 | 1.01                               |
| $1.5 \times 10^{-2}$   | 0.1                        | 1.0             | acetate     | 0.12      | 4.57 | 1.63                               |
| $2.0 \times 10^{-2}$   | 0.1                        | 1.0             | acetate     | 0.12      | 4.60 | 2.37                               |
| $1 \times 10^{-3}$     | 0.02                       | 5               | perchlorate | 0.10      | 2.5  | 0.015                              |
| $1 \times 10^{-3}$     | 0.02                       | 5               | perchlorate | 0.10      | 2.80 | 0.0285                             |
| $1 \times 10^{-3}$     | 0.02                       | 5               | perchlorate | 0.10      | 3.21 | 0.056                              |
| $1 \times 10^{-2}$     | 0.1                        | 1.0             | perchlorate | 0.11      | 3.18 | 0.321                              |
| $1 \times 10^{-2}$     | 0.1                        | 1.0             | perchlorate | 0.11      | 3.33 | 0.370                              |
| $1 \times 10^{-2}$     | 0.1                        | 1.0             | perchlorate | 0.11      | 3.48 | 0.432                              |

|                    |      |     |             |      |      |       |
|--------------------|------|-----|-------------|------|------|-------|
| $1 \times 10^{-2}$ | 0.1  | 1.0 | perchlorate | 0.11 | 3.60 | 0.489 |
| $1 \times 10^{-2}$ | 0.1  | 1.0 | perchlorate | 0.11 | 3.77 | 0.589 |
| $1 \times 10^{-2}$ | 0.1  | 1.0 | perchlorate | 0.10 | 3.97 | 0.707 |
| $5 \times 10^{-3}$ | 0.1  | 1.0 | perchlorate | 0.10 | 3.74 | 0.362 |
| $5 \times 10^{-3}$ | 0.1  | 1.0 | acetate     | 0.10 | 3.81 | 0.402 |
| $5 \times 10^{-3}$ | 0.1  | 1.0 | acetate     | 0.10 | 4.09 | 0.464 |
| $5 \times 10^{-3}$ | 0.1  | 1.0 | acetate     | 0.10 | 4.29 | 0.519 |
| $5 \times 10^{-3}$ | 0.1  | 1.0 | acetate     | 0.10 | 4.49 | 0.579 |
| $5 \times 10^{-3}$ | 0.1  | 1.0 | acetate     | 0.10 | 4.63 | 0.84  |
| $5 \times 10^{-3}$ | 0.1  | 1.0 | acetate     | 0.10 | 4.70 | 0.73  |
| $5 \times 10^{-3}$ | 0.1  | 1.0 | acetate     | 0.10 | 4.89 | 0.78  |
| $5 \times 10^{-3}$ | 0.1  | 1.0 | acetate     | 0.10 | 5.12 | 0.92  |
| $5 \times 10^{-3}$ | 0.1  | 1.0 | acetate     | 0.10 | 5.43 | 1.37  |
| $5 \times 10^{-3}$ | 0.1  | 1.0 | phosphate   | 0.21 | 5.56 | 1.47  |
| $5 \times 10^{-3}$ | 0.1  | 1.0 | phosphate   | 0.22 | 5.59 | 3.36  |
| $5 \times 10^{-3}$ | 0.1  | 1.0 | phosphate   | 0.23 | 6.08 | 6.43  |
| $5 \times 10^{-3}$ | 0.1  | 1.0 | phosphate   | 0.25 | 6.53 | 15.9  |
| $5 \times 10^{-3}$ | 0.1  | 1.0 | phosphate   | 0.27 | 6.90 | 36.5  |
| $5 \times 10^{-3}$ | 0.1  | 1.0 | phosphate   | 0.28 | 7.17 | 57.7  |
| $5 \times 10^{-3}$ | 0.1  | 1.0 | phosphate   | 0.25 | 6.73 | 16.84 |
| $5 \times 10^{-3}$ | 0.1  | 1.0 | phosphate   | 0.26 | 6.76 | 24.6  |
| $5 \times 10^{-3}$ | 0.1  | 1.0 | phosphate   | 0.27 | 6.96 | 37.03 |
| $5 \times 10^{-3}$ | 0.1  | 1.0 | phosphate   | 0.28 | 7.20 | 64.8  |
| $5 \times 10^{-3}$ | 0.1  | 1.0 | phosphate   | 0.29 | 7.52 | 137   |
| $2 \times 10^{-4}$ | 0.02 | 1.0 | borate      | 0.10 | 8.60 | 38.4  |
| $2 \times 10^{-4}$ | 0.02 | 1.0 | borate      | 0.10 | 8.62 | 40.2  |
| $2 \times 10^{-4}$ | 0.02 | 1.0 | borate      | 0.10 | 8.78 | 50.3  |

|                    |      |     |        |      |      |      |
|--------------------|------|-----|--------|------|------|------|
| $2 \times 10^{-4}$ | 0.02 | 1.0 | borate | 0.10 | 8.93 | 67.8 |
| $2 \times 10^{-4}$ | 0.02 | 1.0 | borate | 0.10 | 9.08 | 88.0 |
| $2 \times 10^{-4}$ | 0.02 | 1.0 | borate | 0.10 | 9.23 | 113  |

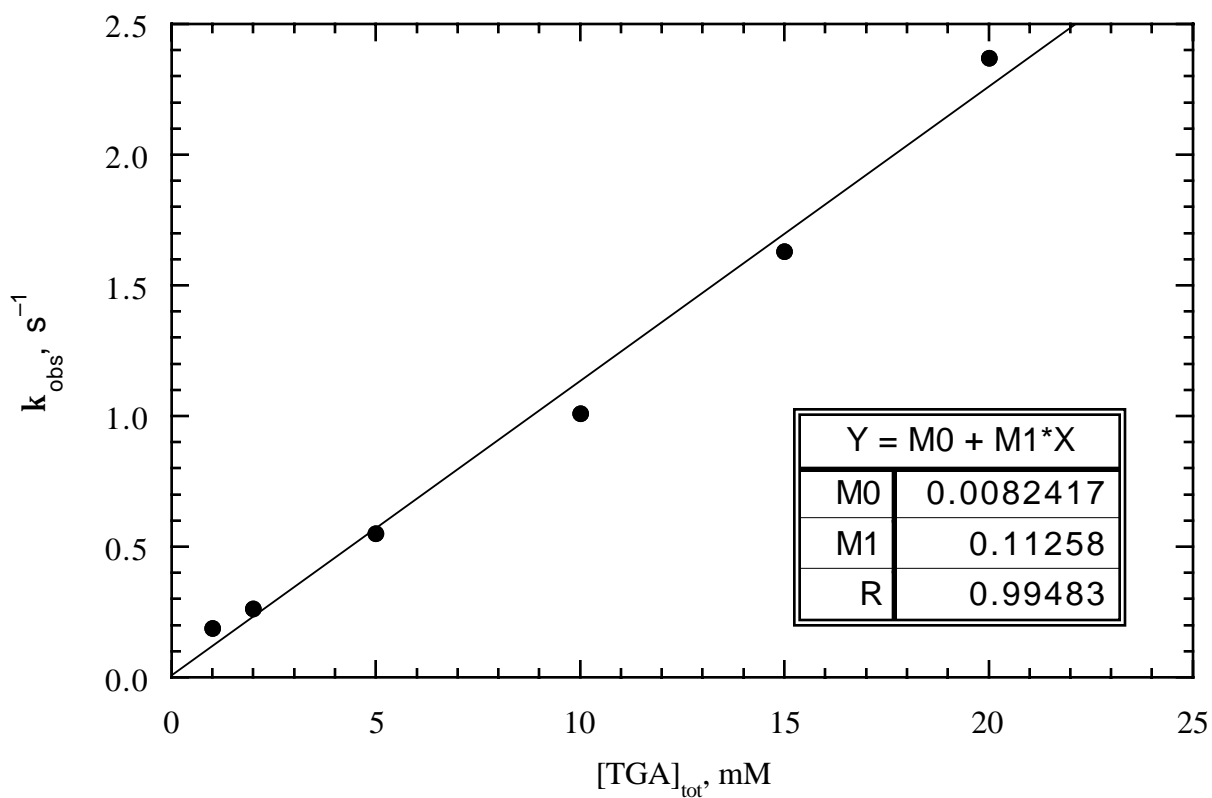

**Figure S-1.** Dependence of the pseudo-first-order rate constant ( $k_{\text{obs}}$ ) on  $[\text{TGA}]_{\text{tot}}$ . The slope of the line is  $113 \text{ M}^{-1} \text{ s}^{-1}$ .  $[\text{Ir(IV)}]_0 = 1 \times 10^{-4} \text{ M}$ ,  $[\text{bathophen}] = 1 \times 10^{-3} \text{ M}$ , NaOAc-HOAc buffer ( $\mu = 0.10 \text{ M}$ ),  $\text{pH} = 4.53 \sim 4.60$ , and  $[\text{TGA}]_0 = 1 \times 10^{-3} \sim 2 \times 10^{-2} \text{ M}$ .
